# Supplementary material for: A new BCR-ABL1 Drosophila model as a powerful tool to elucidate the pathogenesis and progression of chronic myeloid leukemia
Source: PubMed Central journal article supplement — Haematologica. 2018 Nov 8;104(4):717–28. doi: 10.3324/haematol.2018.198267 (PMC6442973; doi:10.3324/haematol.2018.198267), 2019-04
Supplement: 2018_198267-Disclosures_and_Contributions.pdf [file 2018_198267-Disclosures_and_Contributions.pdf]

Haematologica  
HAEMATOL/2018/198267  
Version 3

A new BCR-ABL1 Drosophila model as a powerful tool to elucidate  
pathogenesis and progression of chronic myeloid leukemia

Roberto Bernardoni, Giorgia Giordani, Elisabetta Signorino, Sara  
Monticelli, Francesca Messa, Monica Pradotto, Valentina Rosso, Enrico  
Bracco, Angela Giangrande, Giovanni Perini, Giuseppe Saglio, and  
Daniela Cilloni

Disclosures: the authors have nothing to disclose

Contributions: G.G., E.S., F.M., M.P., V.R., S.M., E.B. and R.B. performed experiments;  
R.B., G.G., E.S. and D.C. designed the experiments; R.B., G.G., E.S., F.M., G.P., G.S. and  
D.C. interpreted the data; R.B., G.G., E.S. and D.C. wrote the manuscript. All authors read  
and approved the final manuscript
